# Supplementary material for: Carbothermally generated copper–molybdenum carbide supported on graphite for the CO2 hydrogenation to methanol
Source: Royal Society of Chemistry journal article supplement (doi:10.1039/d1cy00410g), 2021-01-01
Supplement: d1cy00410g1.pdf [file d1cy00410g1.pdf]

### Supplementary material

Fig S1 *In situ* XRD under H<sub>2</sub> of the catalysts. a) MoxC/H; b) 1CuMoxC/H; c) 3CuMoxC/H; d) CuMoxC/H; e) MoxC/H-700; f) CuMoxC/H700. XRD of spent catalyst after reaction at 230 °C: g) MoxC/H-PR; h) CuMoxC/H-PR ; i) MoxC/H700-PR j) CuMoxC/H-700-PR.

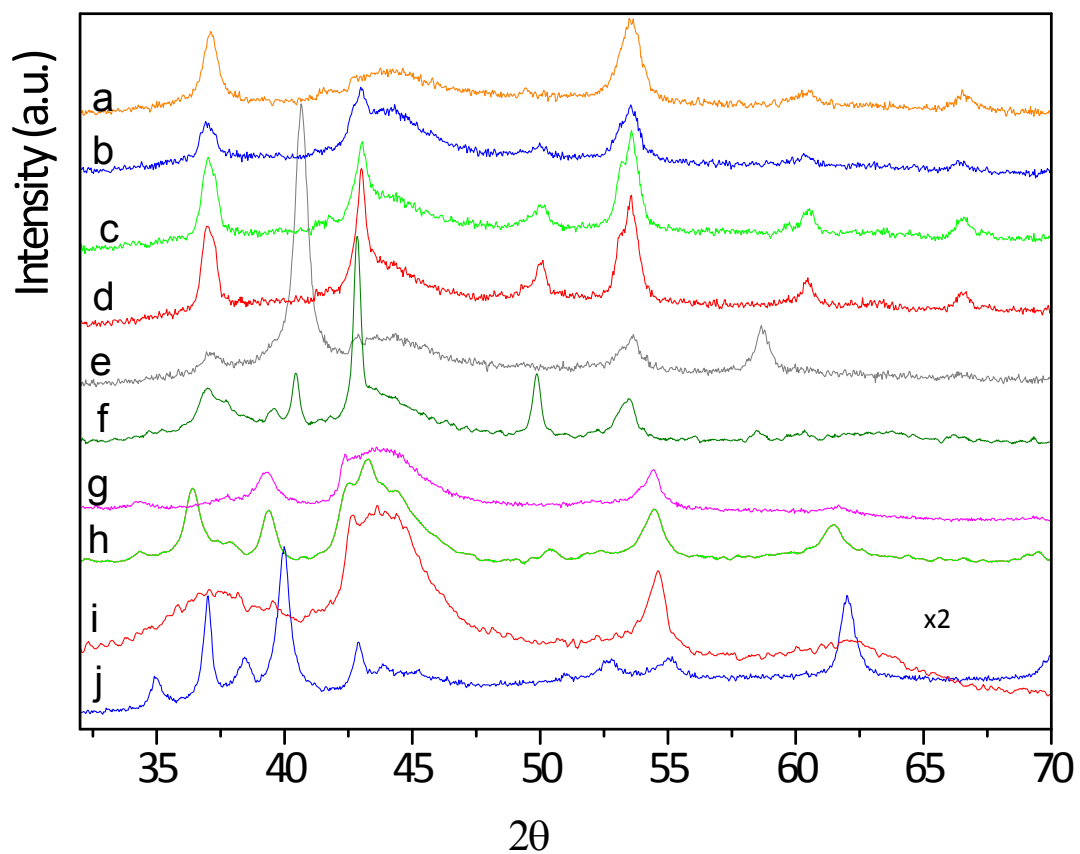

Fig S2. XPS Mo 3d Region of carburised samples at 600 °C under H<sub>2</sub> A) Mo<sub>x</sub>C/H; B) CuMo<sub>x</sub>C/H; at 700 °C under H<sub>2</sub> C) Mo<sub>x</sub>C/H-700, D) CuMo<sub>x</sub>C/H-700 ,Spent catalysts: E) -Mo<sub>x</sub>C/H-PR and F) CuMo<sub>x</sub>C/H-PR. XPS Mo 3d Region of passivated samples G) 0.5CuMo<sub>x</sub>C/H; H) 1CuMo<sub>x</sub>C/H; I) 3CuMo<sub>x</sub>C/H. XPS Cu 2p Region of the freshly carburized catalysts J) CuMo<sub>x</sub>C/H; K) CuMo<sub>x</sub>C/H-700

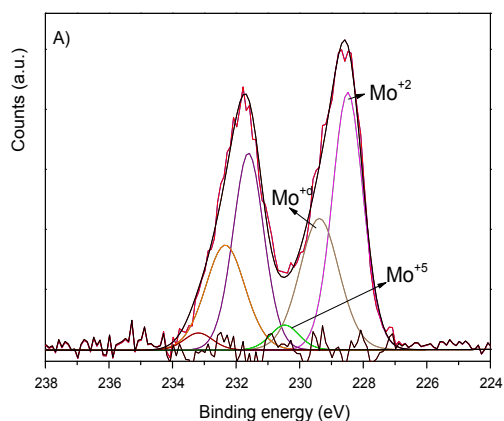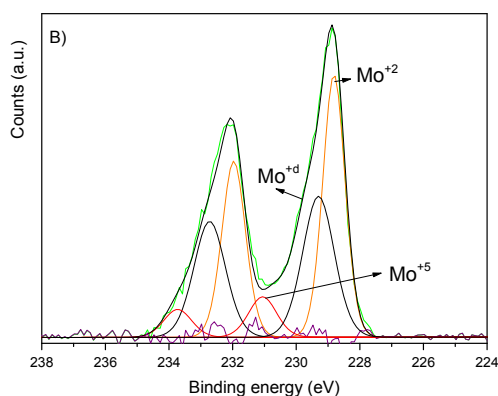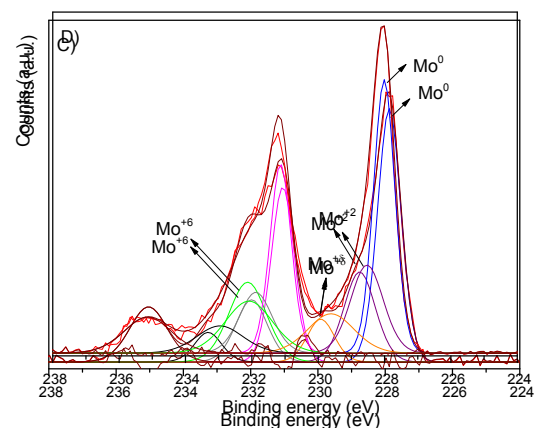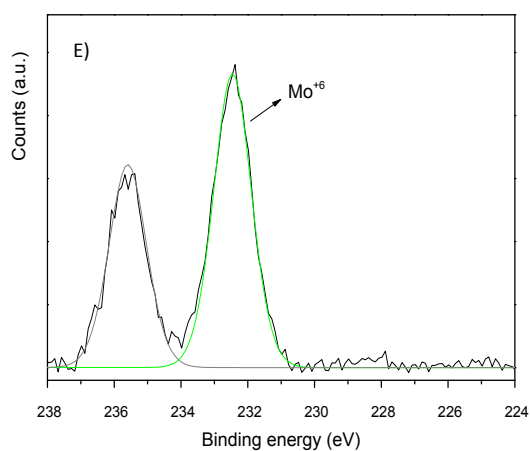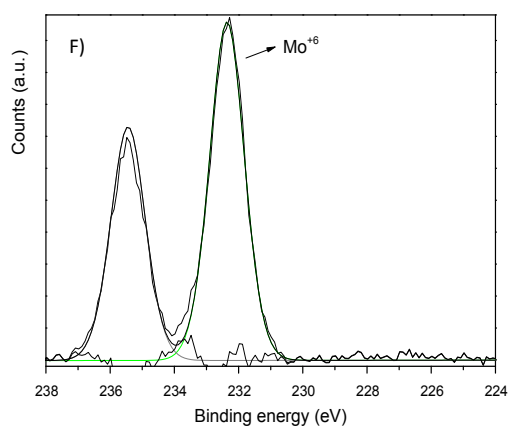



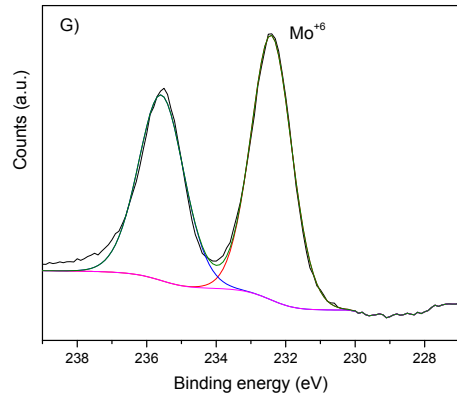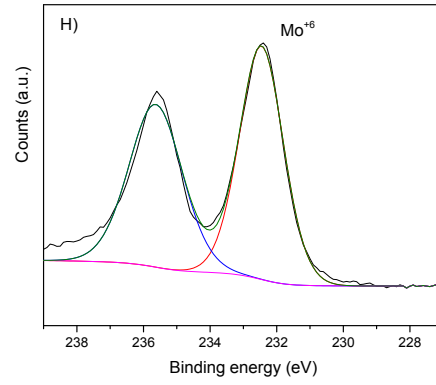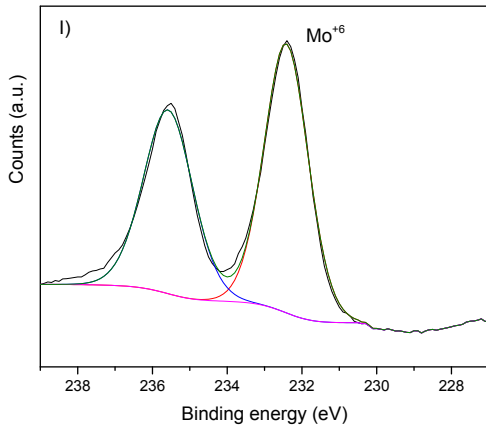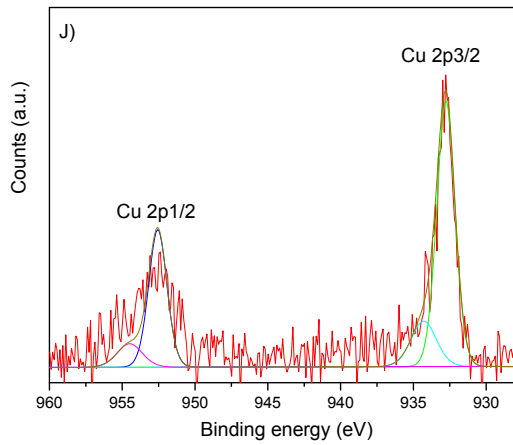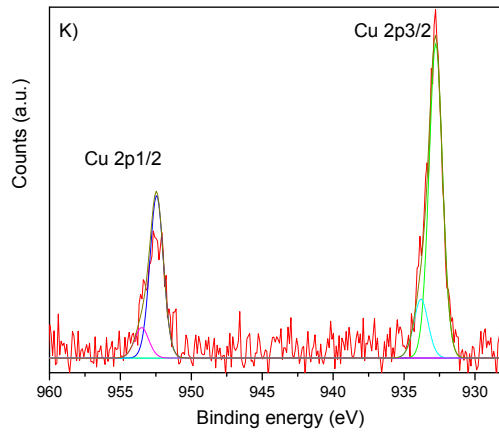

Fig S3.

a) TEM Cu/H and the corresponding Fast-Fourier transform (FFT) pattern

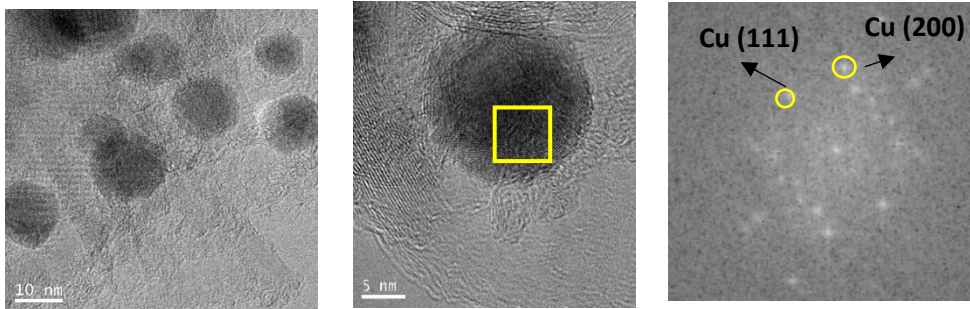

b) TEM images of Mo<sub>x</sub>C/H

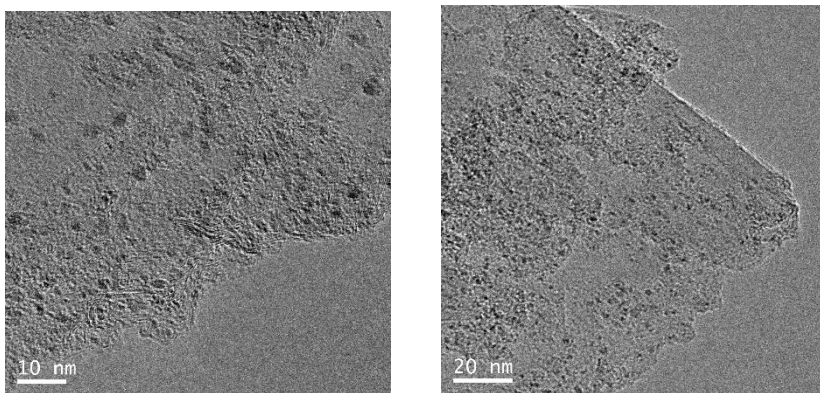

c) TEM images of CuMo<sub>x</sub>C/H showing areas with small Mo phases

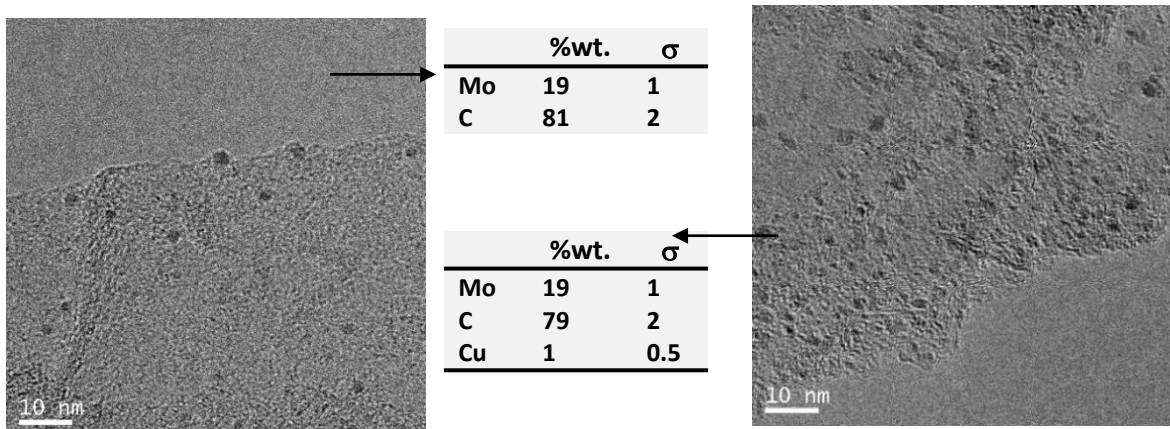

d) TEM images of spent catalysts.

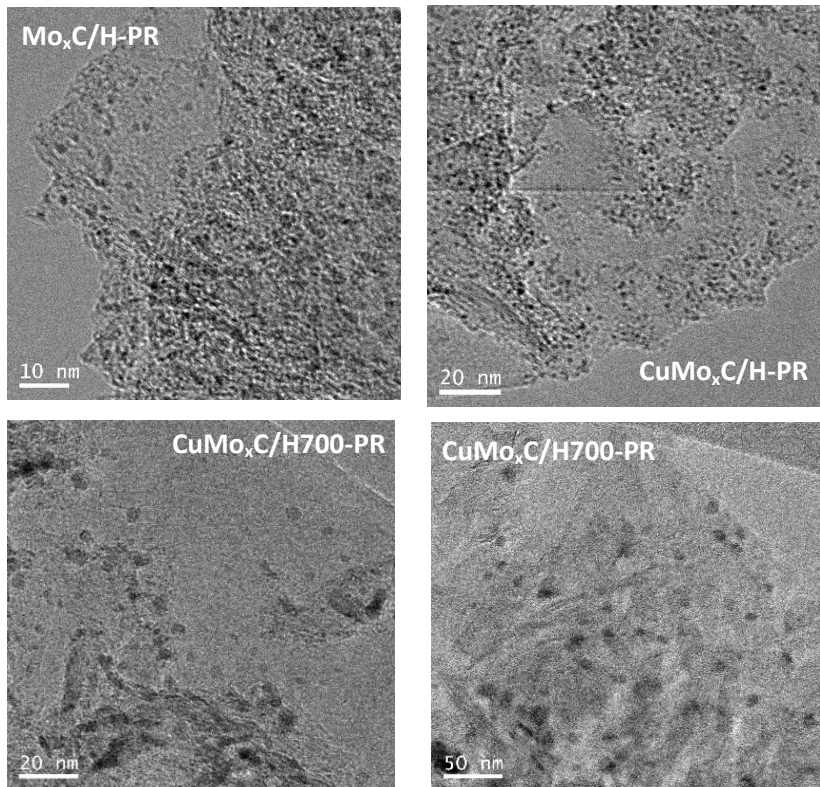

e)  $\text{CuMo}_x\text{C}/\text{H}$  HAADF-STEM images showing individual large Cu particles where no Mo was identified.

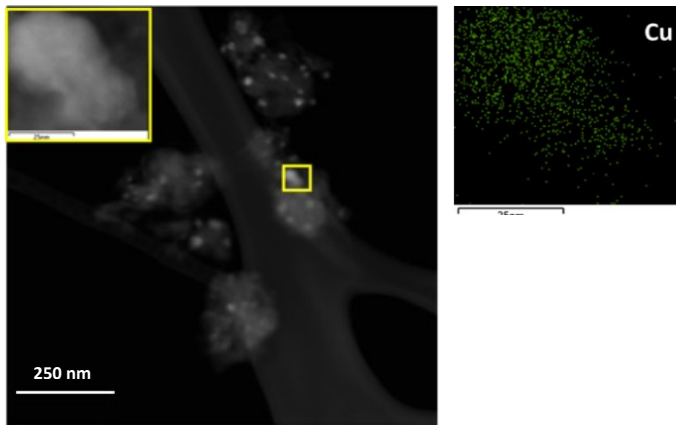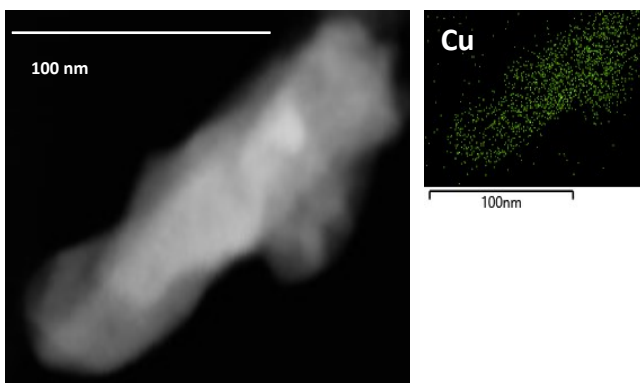

Fig S4 TPD experiments with detection of hydrogen evolved.

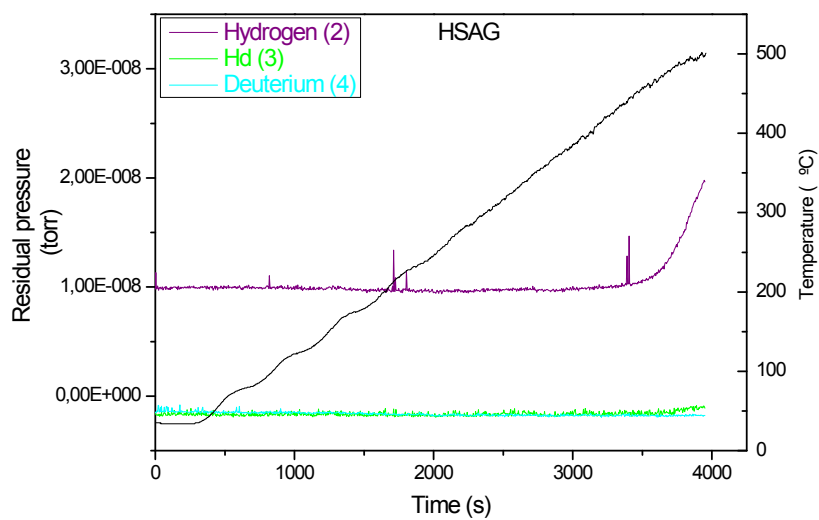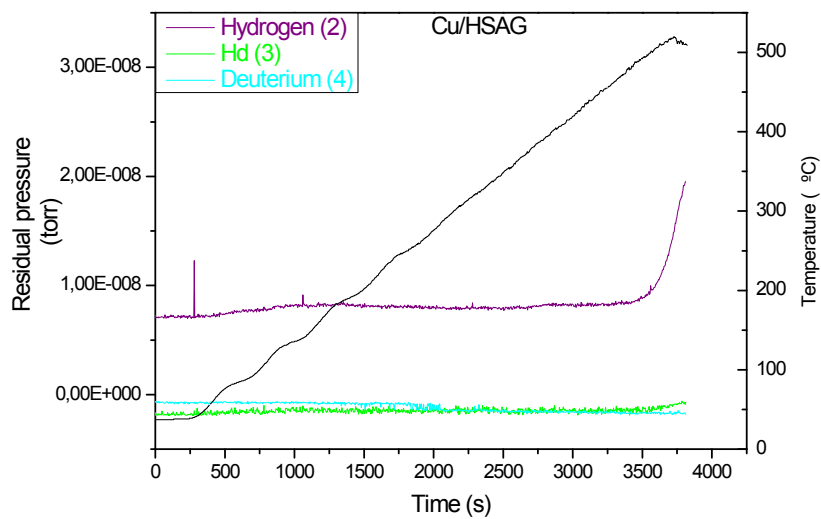

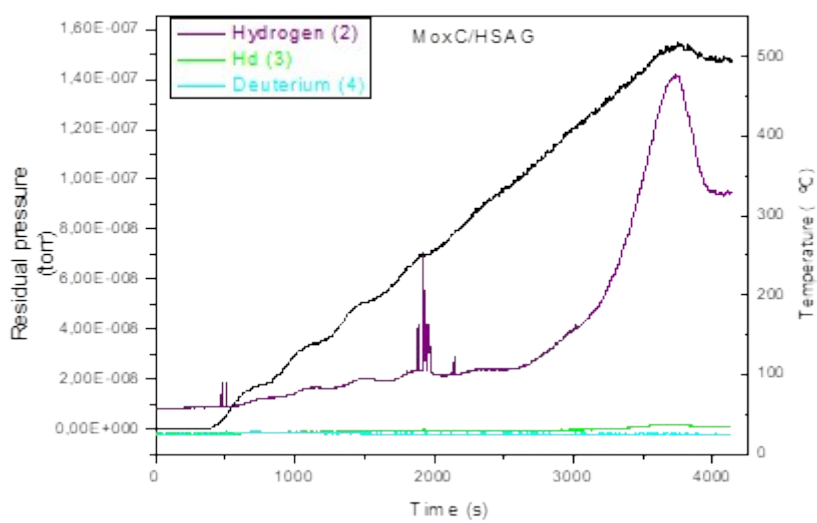

Fig S5 MS profiles during H<sub>2</sub>-TPR of impregnated samples. A) MoxC/H, B) CuMoxC/H and C) Cu/H.

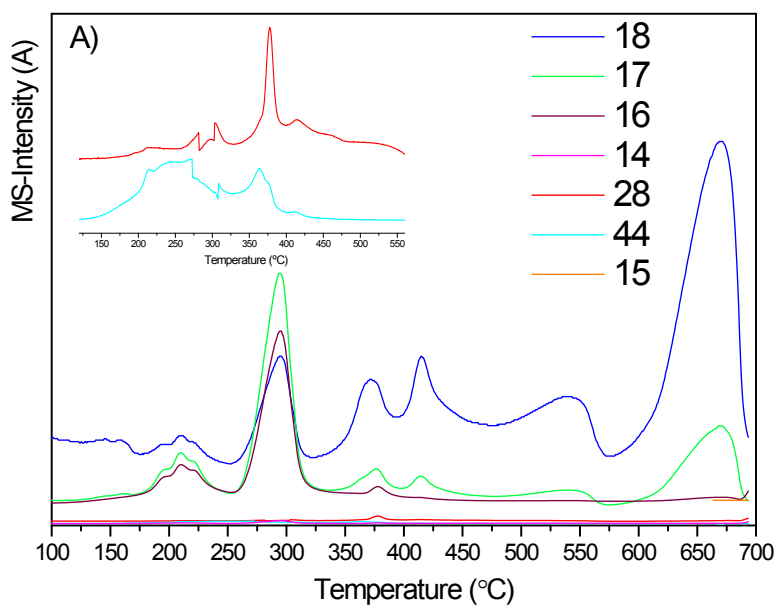



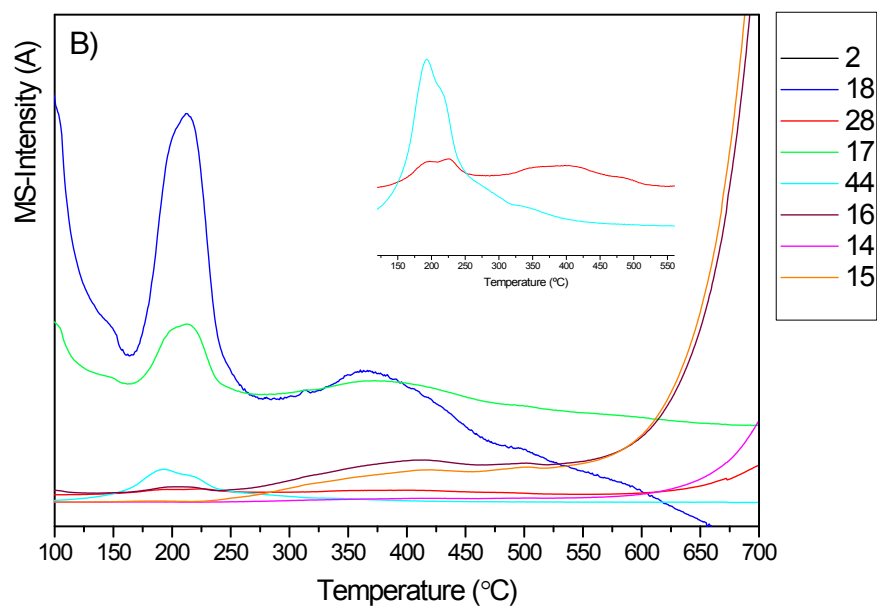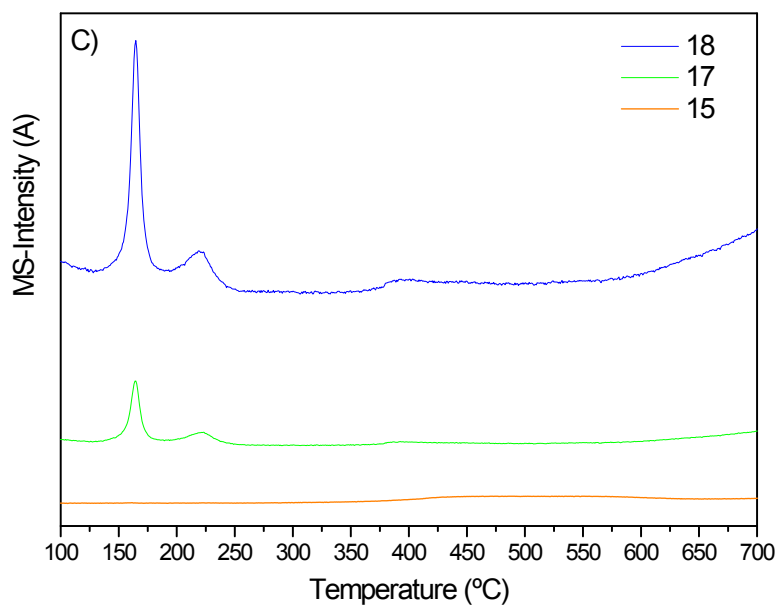

Fig. S6 Rates of CH<sub>4</sub> and CO formation at 20 bar, WHSV=3600 h<sup>-1</sup> and CO<sub>2</sub>:H<sub>2</sub>:He (1:3:6)

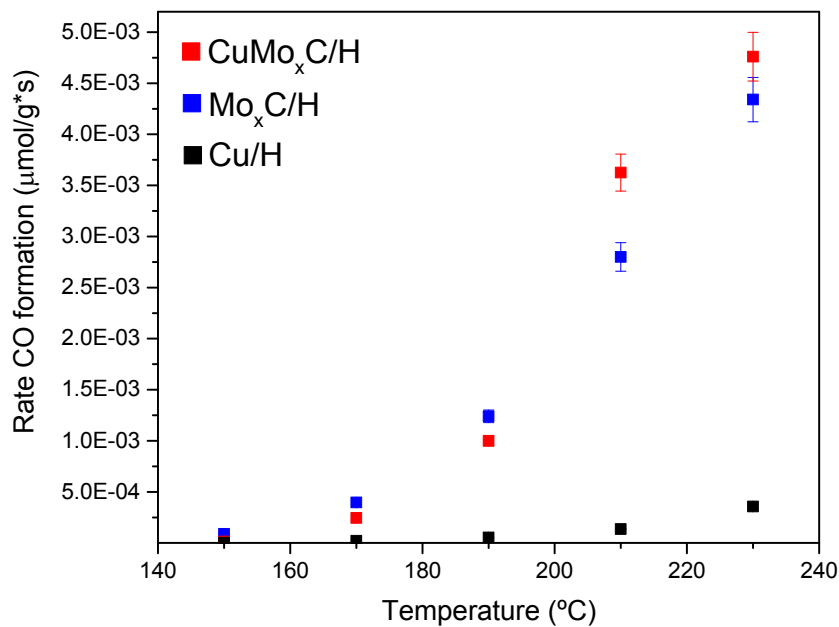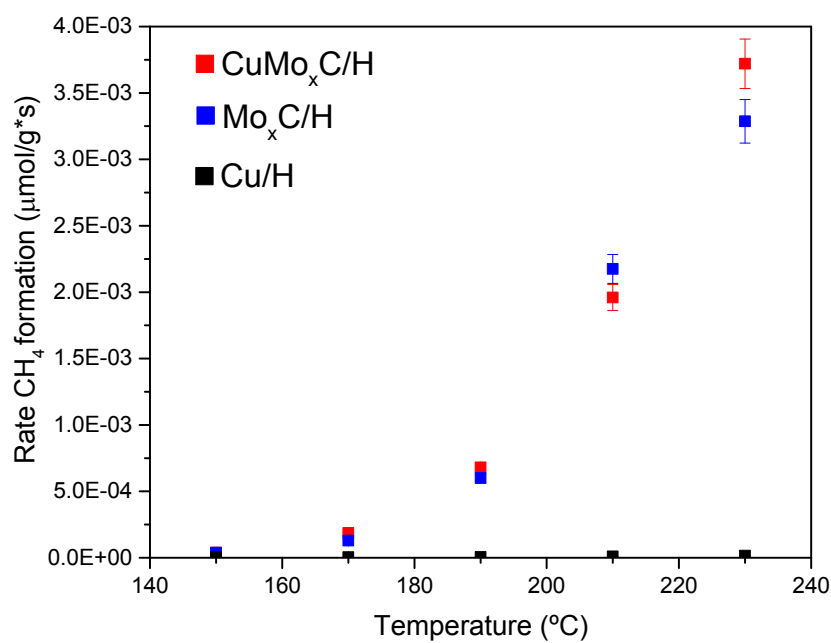

Fig S7. Cu/Mo XPS atomic ratio vs theoretical value.

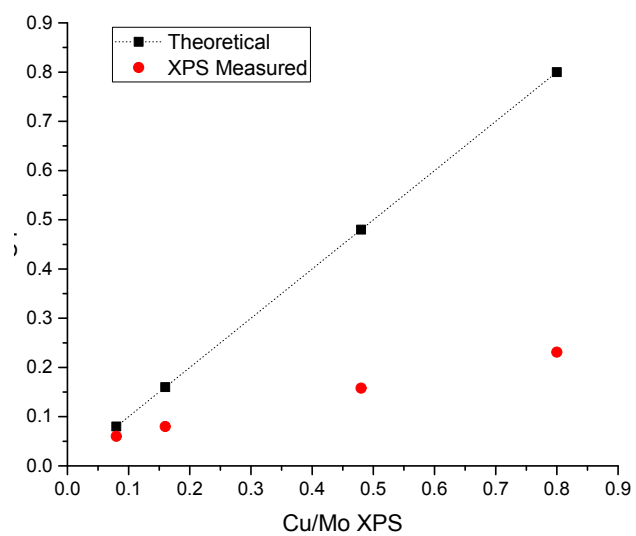

Table S1. Conversion (%) and selectivity (%) at 20 bar, WHSV=3600 h<sup>-1</sup> and CO<sub>2</sub>:H<sub>2</sub>:He (1:3:6)

| Catalyst            | T(°C) | Conversion | S-CH <sub>3</sub> OH | S-CH <sub>4</sub> | S- CO |
|---------------------|-------|------------|----------------------|-------------------|-------|
| <b>MoxC/H</b>       | 150   | 2.5        | 85.4                 | 4.0               | 9.2   |
|                     | 170   | 7.2        | 74.0                 | 7.9               | 17.1  |
|                     | 190   | 11.8       | 48.1                 | 17.0              | 31.2  |
|                     | 210   | 21.1       | 25.7                 | 28.1              | 40.1  |
|                     | 230   | 31.3       | 16.0                 | 35.8              | 41.9  |
| <b>CuMoxC/H</b>     | 150   | 4.8        | 96.0                 | 2.4               | 0.9   |
|                     | 170   | 9.2        | 85.0                 | 4.2               | 8.1   |
|                     | 190   | 15.0       | 65.0                 | 12                | 20    |
|                     | 210   | 29.0       | 36.0                 | 22.5              | 37.5  |
|                     | 230   | 34.0       | 25.0                 | 29                | 42    |
| <b>Cu/H</b>         | 150   | 0.2        | 88.0                 | 7.0               | 3.0   |
|                     | 170   | 0.3        | 67.3                 | 6.2               | 25.1  |
|                     | 190   | 0.4        | 55.2                 | 4.0               | 39.8  |
|                     | 210   | 0.7        | 40.2                 | 3.9               | 55.2  |
|                     | 230   | 1.5        | 27.1                 | 3.1               | 70.1  |
| <b>Cu/H600</b>      | 150   | 0.3        | 87.1                 | 7.2               | 2.9   |
| <b>MoxC/H-700</b>   | 150   | 2.2        | 70.3                 | 6.8               | 22.4  |
| <b>CuMoxC/H-700</b> | 150   | 3.8        | 89.3                 | 2.9               | 7.1   |
| <b>MoxC/H-700</b>   | 230   | 20.1       | 12.2                 | 37.3              | 46.4  |
| <b>CuMoxC/H-700</b> | 230   | 22.1       | 22.2                 | 24.4              | 48.1  |
| <b>0.5CuMoxC/H</b>  | 150   | 3.1        | 90.2                 | 2.9               | 6.8   |
| <b>1 CuMoxC/H</b>   | 150   | 3.3        | 90.6                 | 2.4               | 6.4   |
| <b>3 CuMoxC/H</b>   | 150   | 3.5        | 90.2                 | 1.9               | 6.2   |
